# Supplementary material
Source: PubMed Central journal article supplement (PMC4734906)
Supplement: NIHMS717528-supplement-Supplement.pdf [file NIHMS717528-supplement-Supplement.pdf]

## DATA SUPPLEMENT

### Atrial-selective targeting of arrhythmogenic phase-3 early afterdepolarizations in human myocytes

S. Morotti<sup>1</sup>, A.D. McCulloch<sup>2</sup>, D.M. Bers<sup>1</sup>, A.G. Edwards<sup>3,4</sup>, E. Grandi<sup>1,@</sup>

<sup>1</sup> Department of Pharmacology, University of California Davis, Davis, CA, USA

<sup>2</sup> Department of Bioengineering, University of California San Diego, La Jolla, CA, USA

<sup>3</sup> Institute for Experimental Medicine, Oslo University Hospital Ullevål, Oslo, Norway

<sup>4</sup> Simula Research Laboratory, Lysaker, Norway

**Table S1 – EADs occurrence at varying model parameters (□ No EAD, ■ EAD).**

|                              | -5% | -3% | +3% | +5% |
|------------------------------|-----|-----|-----|-----|
| <b>G<sub>Na</sub></b>        | ■   | ■   | ■   | ■   |
| <b>G<sub>Ca</sub></b>        | ■   | ■   | ■   | ■   |
| <b>I<sub>NCX,max</sub></b>   | ■   | ■   | ■   | ■   |
| <b>I<sub>NaK,max</sub></b>   | ■   | ■   | ■   | ■   |
| <b>G<sub>Nab</sub></b>       | ■   | ■   | ■   | ■   |
| <b>G<sub>Cab</sub></b>       | ■   | ■   | ■   | ■   |
| <b>I<sub>PMCA,max</sub></b>  | ■   | ■   | ■   | ■   |
| <b>G<sub>RyR</sub></b>       | ■   | ■   | ■   | ■   |
| <b>SERCA V<sub>max</sub></b> | ■   | ■   | ■   | ■   |
| <b>G<sub>to</sub></b>        | ■   | ■   | ■   | ■   |
| <b>G<sub>Kur</sub></b>       | ■   | ■   | ■   | ■   |
| <b>G<sub>Kr</sub></b>        | ■   | ■   | ■   | ■   |
| <b>G<sub>Ks</sub></b>        | ■   | ■   | ■   | ■   |
| <b>G<sub>K1</sub></b>        | ■   | ■   | ■   | ■   |
| <b>G<sub>Kp</sub></b>        | ■   | ■   | ■   | ■   |
| <b>G<sub>Cl</sub></b>        | ■   | ■   | ■   | ■   |
| <b>G<sub>ClCa</sub></b>      | ■   | ■   | ■   | ■   |

G<sub>Na</sub>, Na<sup>+</sup> current conductance; G<sub>Ca</sub>, L-type Ca<sup>+</sup> current conductance; I<sub>NCX,max</sub>, Na<sup>+</sup>/Ca<sup>2+</sup> exchanger maximal transport rate; I<sub>NaK,max</sub>, Na<sup>+</sup>/K<sup>+</sup> pump maximal transport rate; G<sub>Nab</sub>, Na<sup>+</sup> background current conductance; G<sub>Cab</sub>, Ca<sup>2+</sup> background current conductance; I<sub>PMCA,max</sub>, sarcolemmal Ca<sup>2+</sup> pump maximal transport rate; G<sub>RyR</sub>, ryanodine receptors conductance; SERCA V<sub>max</sub>, SERCA maximal transport rate; G<sub>to</sub>, transient outward K<sup>+</sup> current conductance; G<sub>Kur</sub>, ultra-rapid delayed rectifier outward K<sup>+</sup> current conductance; G<sub>Kr</sub>, rapidly activating delayed rectifier K<sup>+</sup> current conductance; G<sub>Ks</sub>, slowly activating delayed rectifier K<sup>+</sup> current conductance; G<sub>K1</sub>, time-independent K<sup>+</sup> current conductance; G<sub>Kp</sub>, plateau K<sup>+</sup> current conductance; G<sub>Cl</sub>, background Cl<sup>-</sup> current conductance; G<sub>ClCa</sub>, Ca<sup>2+</sup>-dependent Cl<sup>-</sup> current conductance.

## Equilibrium vs. non-equilibrium components of $I_{Na}$

We characterized total and theoretically maximum equilibrium components of the  $Na^+$  current ( $I_{Na}$ ) observed during repolarization of three different repolarization ramps (50-, 100-, and 500-ms long, Fig. S1A).

To do this, we plotted total simulated  $I_{Na}$  (Fig. S1B), which at any time is the sum of late ( $I_{NaL}$ ), non-equilibrium ( $I_{Na,NE}$ ), and equilibrium ( $I_{Na,win}$ ) currents:

$$I_{Na} = I_{Na,win} + I_{Na,NE} + I_{NaL}$$

and calculated the maximum steady-state window current ( $I_{Na,win,max}$ , Fig. S1C) that would eventually occur at each instantaneous  $E_m$  during repolarization using  $E_m$ -dependence of steady-state activation & inactivation (SSA & SSI, MS Fig. 4B-C):

$$I_{Na,win,max} = G_{Na,max} \cdot SSI \cdot SSA \cdot (E_m - E_{Na})$$

These calculations show that total  $I_{Na}$  during rapid repolarization ramps (Fig. S1B black/red traces) is already substantial at  $E_m$  (and times) where  $I_{Na,win,max}$  is virtually absent (Fig. S1C black/red traces). This indicates that some non-equilibrium (dynamic) component is responsible for this  $E_m$ -dependence, and therefore for the majority of the  $I_{Na}$  during the simulated rapid repolarization. Also, as observed in Edwards *et al* [1], slower repolarization reduces total  $I_{Na}$ , despite the theoretically steady-state  $I_{Na,win,max}$  being trajectory-independent (only depends on instantaneous  $E_m$ ). During this very gradual repolarization, total  $I_{Na}$  reaches at most 5% of that during rapid repolarization at any region of the voltage range (Fig. S1D, inset). Importantly the  $E_m$ -dependence of the very small current elicited during the slowest ramp is much more similar to that of  $I_{Na,win,max}$  (Fig. S1D, blue line in inset vs. black dashed line), suggesting that the window current contributes much more purely to this current.

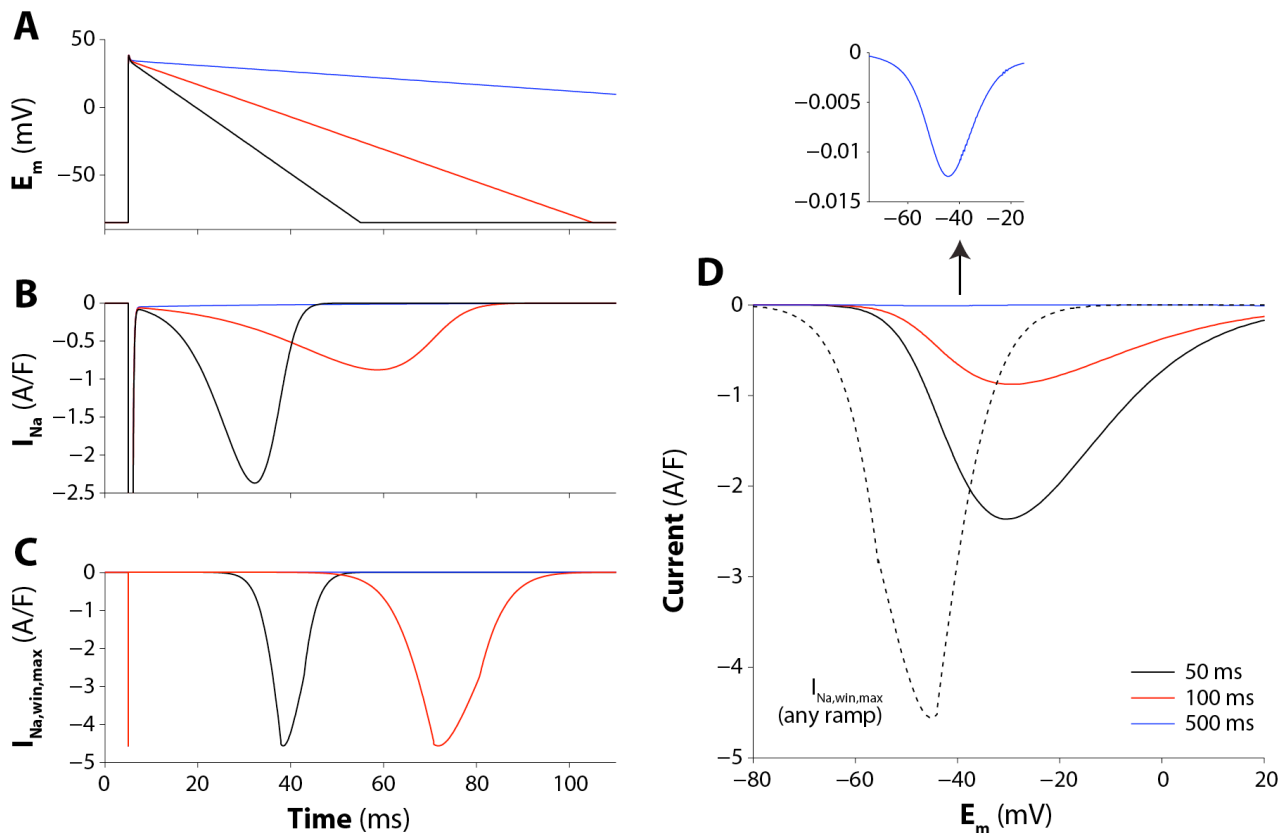

**Figure S1.** **A)** 50-(black) 100-(red) and 500-ms (blue) long repolarizing ramps used as voltage commands. **B)** Simulated  $I_{Na}$  and **C)** theoretical maximal window current elicited by the voltage waveforms in **(A)**. **D)** Instantaneous  $I_{Na}$ - and  $I_{Na,win,max}$ -voltage curves are calculated from **B** and **C** (repolarization phase only).

## Variability in phase-3 EAD morphology

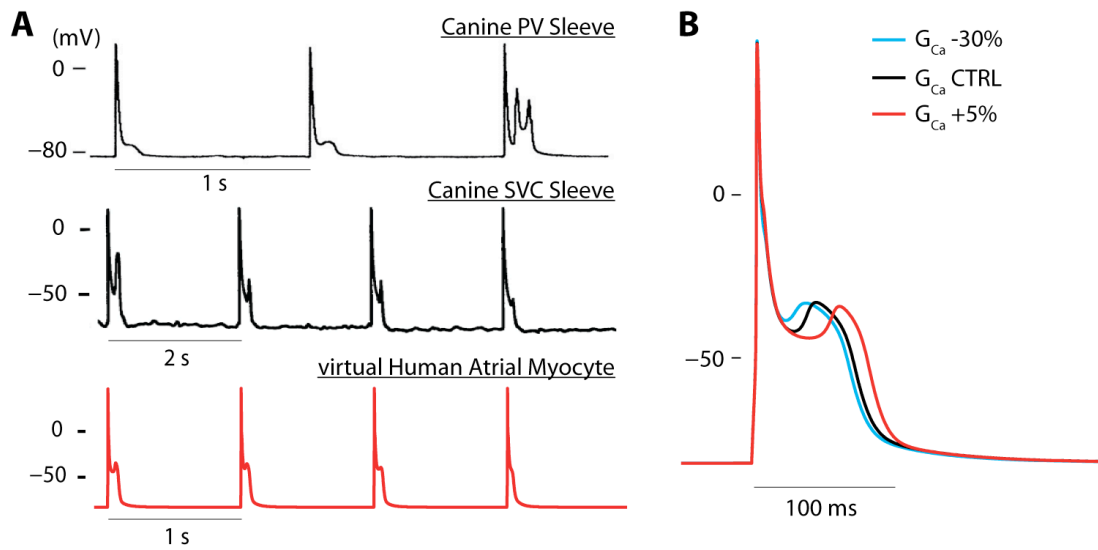

**Figure S2. A)** ACh- and high  $Ca^{2+}$ -induced late phase-3 EADs are observed at slow rates in beats immediately after rapid pacing in both canine PV (reproduced with permission from [2]) and superior vena cava (reproduced with permission from [3]) sleeves. Third row shows EADs evoked in our human atrial model ( $G_{Ca} +5\%$ ) under ACh and ISO conditions. **B)** Effect of varying  $I_{Ca}$  conductance on EAD take-off potential.

## References

1. Edwards *et al.* Circ Arrhythm Electrophysiol. 2014 Dec; 7(6): 1205–1213
2. Sicouri *et al.* Heart Rhythm. 2008 Jul; 5(7): 1019–1026
3. Sicouri *et al.* Circ Arrhythm Electrophysiol. 2012; 5:371-379
